# Supplementary material for: Development of an SI-traceable transmission curve reference material to improve comparability of proton transfer reaction mass spectrometry measurements
Source: Copernicus journal article supplement (doi:10.5194/amt-2022-243), 2022-09-07
Supplement: Supplementary file 1 [file amt-2022-243-supplement.pdf]

# Supporting Information

1  
2  
3  
4  
5  
6  
7  
8  
9  
10  
11  
12  
13  
14  
15  
16  
17  
18  
19  
20  
21  
22  
23  
24  
25

## Development of an SI-traceable transmission curve reference material to improve comparability of proton transfer reaction mass spectrometry measurements

David R. Worton<sup>1</sup>, Sergi Moreno<sup>1,#</sup>, Kieran O'Daly<sup>1</sup>, Rupert Holzinger<sup>2</sup>

<sup>1</sup> National Physical Laboratory, Hampton Road, Teddington, TW11 0LW

<sup>2</sup> Institute for Marine and Atmospheric Research, IMAU, Utrecht University, Utrecht, the Netherlands

*Correspondence to:* David R. Worton ([dave.worton@npl.co.uk](mailto:dave.worton@npl.co.uk))

<sup>#</sup> Now at World Meteorological Organization (WMO), 7bis Avenue de la Paix, C.P. 2300 CH-1211, Geneva 2, Switzerland

### Contents

|                                                                                                         |   |
|---------------------------------------------------------------------------------------------------------|---|
| Supplementary text: Preparation of D3-siloxane reference materials                                      | 2 |
| Table S1 Dates for all the comparisons conducted as part of the validation process                      | 2 |
| Figure S1 Additional supporting validation information using all available FID and MS data              | 3 |
| Figure S2 Stability plots of all components present in the PTR-MS transmission curve reference material | 4 |
| Supplementary text: Preparation and validation of certified reference materials                         | 7 |
| Figure S3 Certified amount fractions of 12 CRMs illustrating the preparation repeatability              | 8 |
| Supplementary text: Additional References                                                               | 8 |

## 26 Preparation of D3-siloxane reference materials

27 Hexamethylcyclotrisiloxane (D3-siloxane) is a solid at room temperature and pressure. To enable it to be added to the gas  
28 cylinder it was dissolved in a solvent (*n*-hexane). *N*-hexane was selected because previous work (Kierkegaard and Mclachlan,  
29 2013) has demonstrated it to be effective for dissolving D3-siloxane and because the proton affinity of *n*-hexane is less than  
30 water and therefore does not undergo proton transfer and is not detectable by PTR-MS when operating in the H<sub>3</sub>O<sup>+</sup> mode.

31  
32 A ratio of nominally 0.05 mol mol<sup>-1</sup> of D3-siloxane to *n*-hexane was empirically determined to avoid any precipitation of D3-  
33 siloxane from solution and to ensure the homogeneity of the mixture prior to injection into the cylinder. This was determined  
34 by preparing different solutions of D3-siloxane in *n*-hexane in 10 mL vials, splitting the content into multiple 2 mL prior to  
35 analysis on a GC-MS/FID (Agilent 6890/5973) equipped with a liquid autosampler. The GC-MS/FID was fitted with a  
36 capillary column (HP-5MS 30 m x 250 μm x 1 μm), the carrier gas was helium with a constant head pressure of 15 psi and a  
37 temperature program started at 30 °C hold for 5 minutes and then ramped up at 10 °C min<sup>-1</sup> to 140 °C; the total time was 16  
38 minutes.

39  
40  
41 **Table S1.** Dates for all the comparisons conducted as part of the validation process.

| Date of comparison | Instrument  | Reference PRM     | Unknown PRM | Age difference <br>(days) |
|--------------------|-------------|-------------------|-------------|---------------------------|
| 29 August 2019     | GC-FID/MS   | 2819              | A638        | 262                       |
| 4 September 2020   | GC-FID/MS   | 2819              | A638        | 262                       |
| 10 September 2020  | GC-FID/MS   | 2819              | A574        | 704                       |
| 11 September 2020  | GC-FID/MS   | 2819              | A578        | 704                       |
| 27 October 2020    | GC-FID/MS   | 2819              | A643        | 233                       |
| 2 December 2020    | Cryo-GC-FID | 2819              | A638        | 262                       |
| 10 December 2020   | Cryo-GC-FID | 2819              | A578        | 704                       |
| 11 December 2020   | Cryo-GC-FID | 2819              | A643        | 233                       |
| 14 December 2020   | Cryo-GC-FID | 2819              | A574        | 704                       |
| 1 September 2021   | GC-FID/MS   | 2819              | D961492     | 709                       |
| 8 June 2022        | GC-FID/MS   | D961492 (toluene) | D711534     | 255                       |
| 16 September 2021  | GC-FID/MS   | D961492 (PFTBA)   | D961399     | 46                        |
| 17 September 2021  | GC-FID/MS   | D961492 (PFTBA)   | D961410     | 47                        |

42

43 **Figure S1.** Supporting validation data showing all the relative difference ( $\Delta x$ ) data for MS (shaded boxes) and FID validation  
 44 data or all components in the different primary reference materials (A574, A578, A638, A643 and D961492) relative to primary  
 45 reference material 2819 (solid symbols). The solid black line represents the average of these validations with the error bar  
 46 representing the associated expanded uncertainty ( $2\sigma$ ). For D4- and D5-siloxane the averages do not include the validations  
 47 from A574 or A578. Methanol and acetaldehyde FID data are from the cryo-GC-FID instrument while all others are from the  
 48 GC-FID/MS instrument, including the MS data for acetaldehyde. Open symbols represent the original data before correcting  
 49 for biases observed in three of the parent mixtures (A410, 5 % low for methanol; 3070, 6.3 % low for MVK and D711530 6  
 50 % low for 1,2,4-TMB). PFTBA and toluene were only included in the most recently prepared PRM (D961492) and are not  
 51 present in 2819. Their validation is described in the text. No MS data was available for toluene, 1,2,4-TCB or PFTBA because  
 52 the specific m/Q ions had not been included in the GC-MS method at the time of data acquisition.

53  
 54

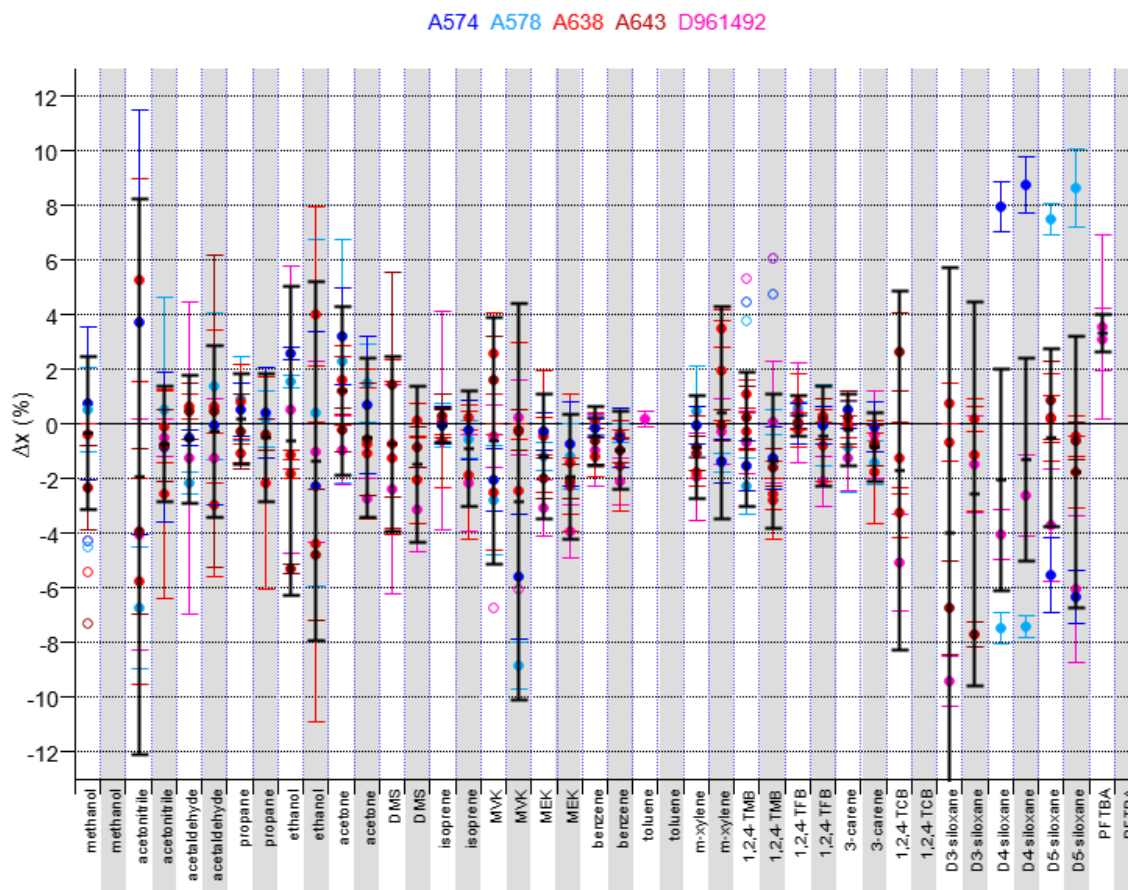

55  
 56

57

58 **Figure S2.** Stability plots of all components present in the PTR-MS transmission curve reference material. The open symbols  
59 show the original data before being corrected for biases in the parent mixtures (for methanol, MVK and 1,2,4-TMB) as  
60 discussed in the text. The best fit curves from least squares straight line regression analyses are shown (solid black line) along  
61 with the 95 % confidence interval of the fits (shaded area). The slope, intercept and F-statistic data from the regression  
62 analyses are shown in Table 3.

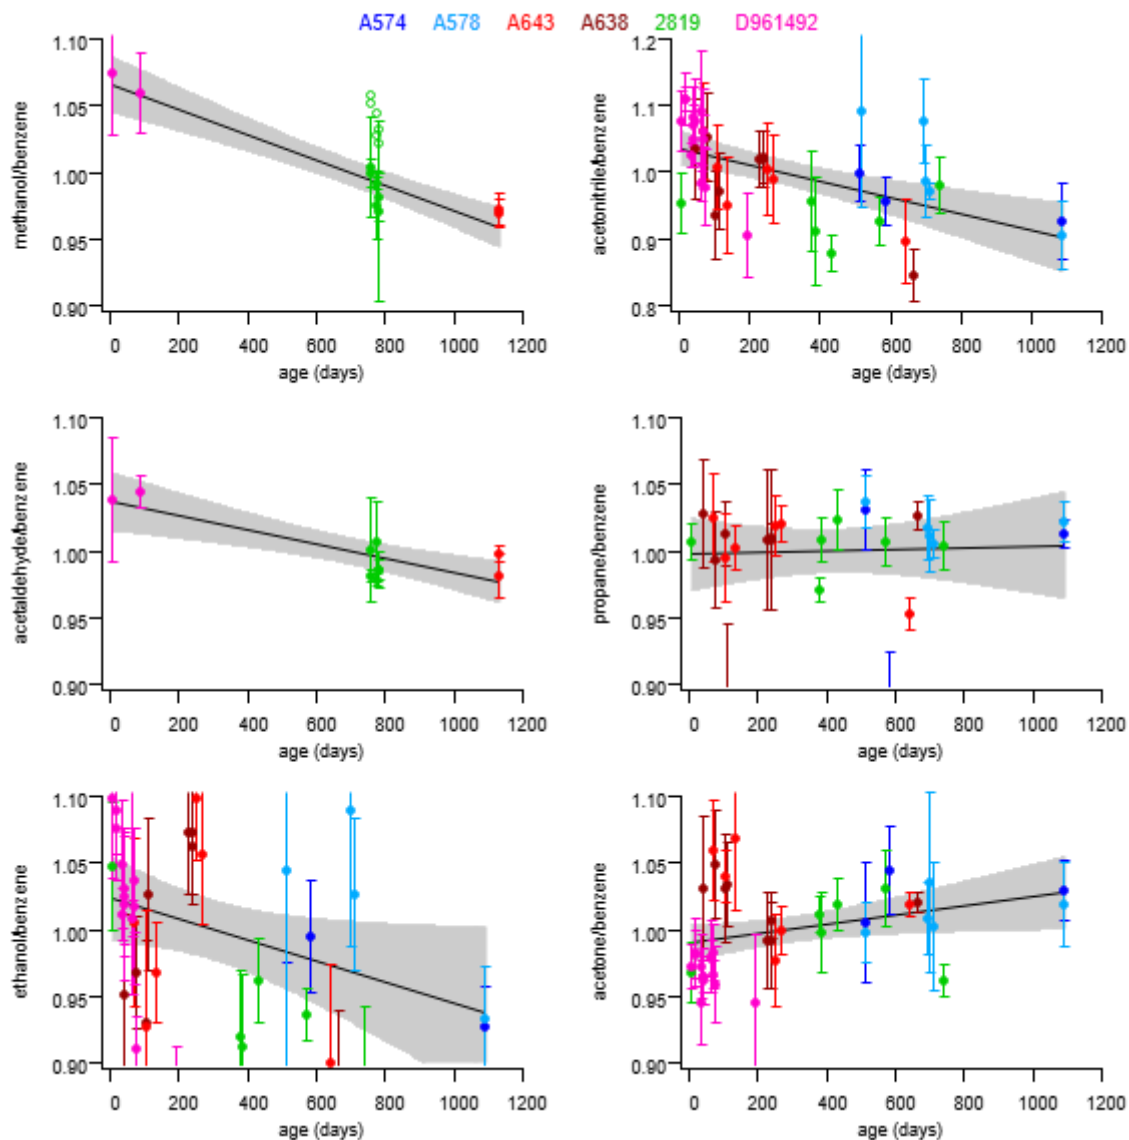

63

64

65

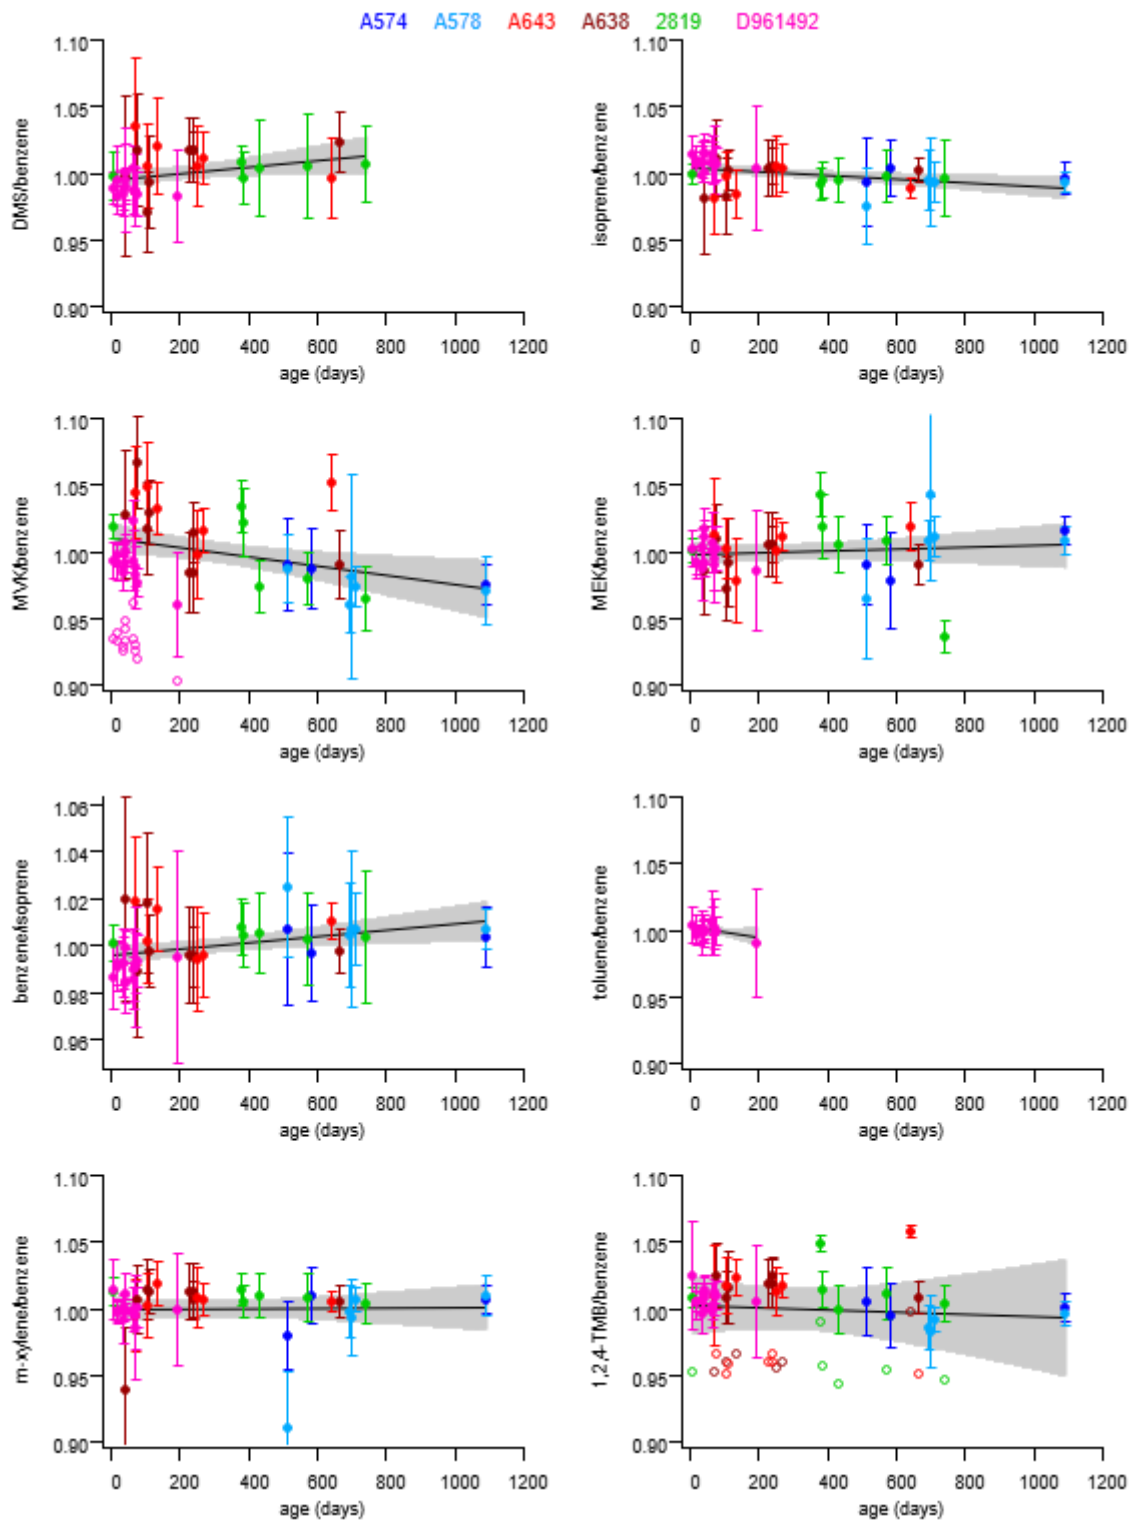

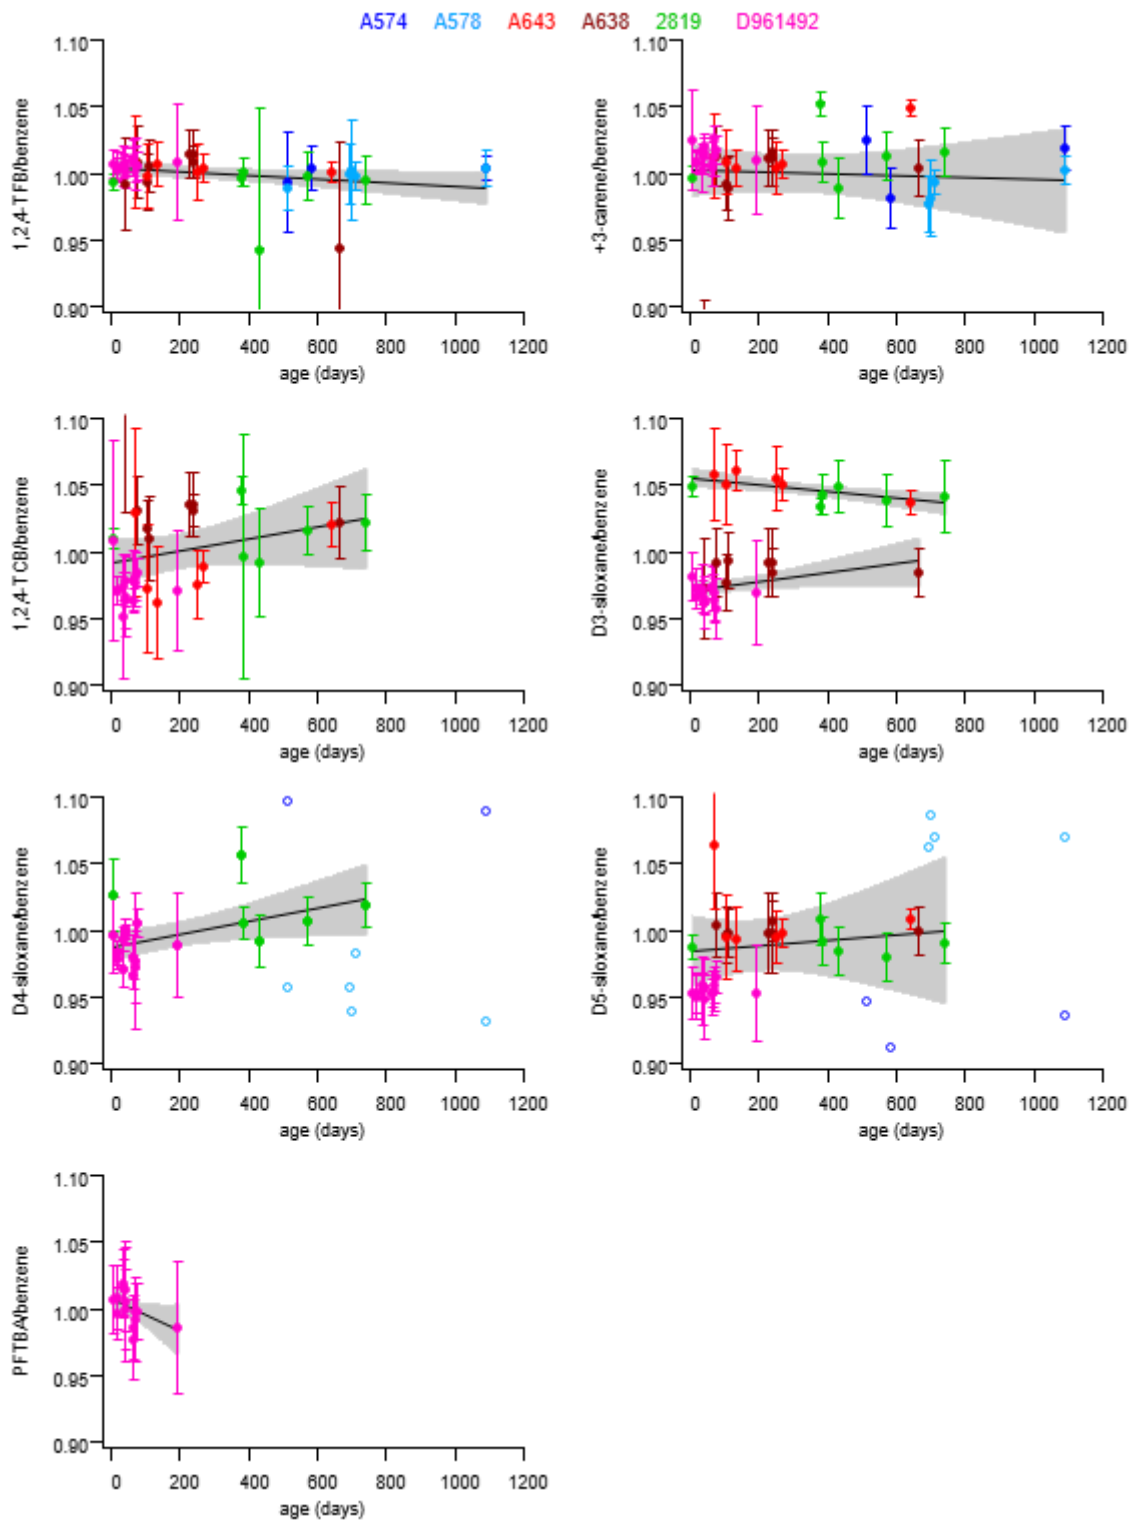

68

69 **Preparation and validation of certified reference materials**

70 In order to meet the requirements of end users an NPL certified reference material (CRM) has been developed and is also  
71 described. Its purpose is to facilitate wider uptake and implementation to improve the comparability of PTR-MS measurements  
72 in a cost-effective and timely manner for end users. To prepare the PTRMS CRMs, the pure components were mixed in vials  
73 and an aliquot added to the evacuated gas cylinder, minimising the weighing and liquid addition steps, thus reducing the  
74 preparation time and effort considerably. The differences in vapour pressure between compounds, e.g., D5 siloxane (0.0003  
75 bar), acetaldehyde (1.2 bar), could have compromised the blending tolerances of the final NPL CRM, because the more volatile  
76 compounds fraction in the liquid mixtures may have been reduced. To minimise this, four vials were prepared, one containing  
77 the most volatile compounds (acetaldehyde, DMS, isoprene, methanol, acetone, ethanol, MVK, MEK and acetonitrile), a  
78 second containing the less volatile non-polar components (benzene, toluene, 1,2,4-TFB, *m*-xylene, 1,2,4-TMB and 3-carene),  
79 a third mixture containing the least volatile components (1,2,4-TCB, D3-siloxane, D4-siloxane and D5-siloxane). Finally, the  
80 PFTBA was added separately as it was immiscible in the other three liquid mixtures listed above. The four groups of pure  
81 chemicals were added to the vials in order from lower vapour pressure to higher vapour pressure, so the more volatile  
82 compounds remained the shortest time in the vials to minimise any evaporative losses. The amount fractions for each  
83 compound in each CRM were assigned as the analytical values determined from comparison to NPL PRM D961492, which  
84 was used as it contained all the components of interest. The repeatability (blend tolerance) in the preparation of the CRMs was  
85 about 20 – 30 % as shown in Figure S3.

86

87 **Figure S3.** Certified amount fractions of 12 CRMs illustrating the preparation repeatability (blend tolerance) at 1  $\mu\text{mol mol}^{-1}$   
88 of approximately 20 - 30 %.  
89

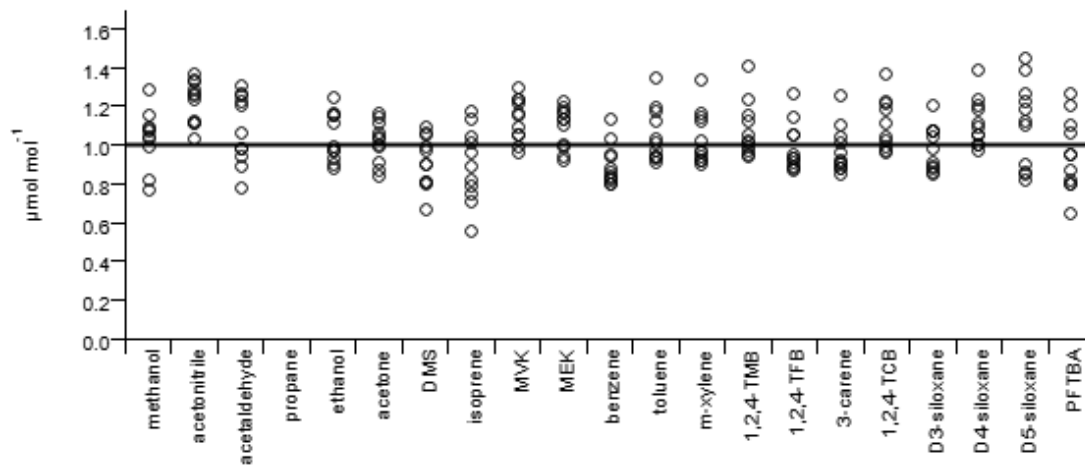

90

91

## 92 **Additional References**

93 Kierkegaard, A. and McLachlan, M. S.: Determination of linear and cyclic volatile methylsiloxanes in air at a regional  
94 background site in Sweden, Atmospheric Environment, 80, 322-329, <https://doi.org/10.1016/j.atmosenv.2013.08.001>,  
95 2013.

96

97
